# Supplementary material for: Excess axial electrostatic repulsion as a criterion for pentagonal bipyramidal DyIII single-ion magnets with high Ueff and TB
Source: Royal Society of Chemistry journal article supplement (doi:10.1039/c8tc00353j), 2018-01-01
Supplement: c8tc00353j1.pdf [file c8tc00353j1.pdf]

## Electronic Supplementary Information

### Excess axial electrostatic repulsion as a criterion for pentagonal bipyramidal Dy<sup>III</sup> single-ion magnets with high $U_{\text{eff}}$ and $T_{\text{B}}$

Zhijie Jiang,<sup>‡</sup> Lin Sun,<sup>‡</sup> Qi Yang, Bing Yin,<sup>\*</sup> Hongshan Ke, Jing Han, Qing Wei, Gang Xie, and Sanping Chen<sup>\*</sup>

*Key Laboratory of Synthetic and Natural Functional Molecule Chemistry of Ministry of Education, College of Chemistry and Materials Science, Northwest University, Xi'an, Shaanxi 710127, China.*

**Corresponding authors**

**Prof. Sanping Chen, Prof. Bing Yin**

**E-mail address:** [sanpingchen@126.com](mailto:sanpingchen@126.com); [rayinyin@nwu.edu.cn](mailto:rayinyin@nwu.edu.cn);

## Table of Contents

|                                                                                 |     |
|---------------------------------------------------------------------------------|-----|
| 1. X-ray crystallographic data.....                                             | S3  |
| 2. The <sup>1</sup> H NMR spectra of H <sub>2</sub> bbpen-CH <sub>3</sub> ..... | S5  |
| 3. X-Ray Powder Diffraction.....                                                | S5  |
| 4. Crystal Structure.....                                                       | S6  |
| 5. Magnetic Measurements.....                                                   | S7  |
| 6. Fitting for complexes 1 and 2.....                                           | S11 |
| 7. Computational details.....                                                   | S13 |
| 8. Discussion section.....                                                      | S15 |

## 1. X-ray crystallographic data

**Table S1.** Crystal data and structure refinement for complexes **1** and **2**.

| Complex                                                    | <b>1</b>                                                          | <b>2</b>                                                          |
|------------------------------------------------------------|-------------------------------------------------------------------|-------------------------------------------------------------------|
| Empirical formula                                          | C <sub>30</sub> H <sub>32</sub> ClDyN <sub>4</sub> O <sub>2</sub> | C <sub>30</sub> H <sub>32</sub> BrDyN <sub>4</sub> O <sub>2</sub> |
| Formula weight                                             | 678.55                                                            | 723.01                                                            |
| Crystal system                                             | Monoclinic                                                        | Monoclinic                                                        |
| Space group                                                | <i>P</i> 2 <sub>1</sub> / <i>n</i>                                | <i>P</i> 2 <sub>1</sub> / <i>n</i>                                |
| <i>a</i> (Å)                                               | 8.6164(9)                                                         | 8.606(3)                                                          |
| <i>b</i> (Å)                                               | 18.5966(19)                                                       | 18.545(6)                                                         |
| <i>c</i> (Å)                                               | 17.2232(17)                                                       | 17.441(6)                                                         |
| $\alpha$ (°)                                               | 90.00                                                             | 90.00                                                             |
| $\beta$ (°)                                                | 92.760(2)                                                         | 93.068(5)                                                         |
| $\gamma$ (°)                                               | 90.00                                                             | 90.00                                                             |
| <i>V</i> (Å <sup>3</sup> )                                 | 2756.6(5)                                                         | 2779.5(15)                                                        |
| <i>Z</i>                                                   | 4                                                                 | 4                                                                 |
| <i>F</i> (000)                                             | 1356                                                              | 1428                                                              |
| <i>R</i> 1 <sup>[a]</sup> , [ <i>I</i> > 2σ( <i>I</i> )]   | 0.0285                                                            | 0.0565                                                            |
| w <i>R</i> 2 <sup>[b]</sup> , [ <i>I</i> > 2σ( <i>I</i> )] | 0.0609                                                            | 0.1644                                                            |
| <i>R</i> 1 <sup>a</sup> , (all data)                       | 0.0402                                                            | 0.0623                                                            |
| w <i>R</i> 2 <sup>b</sup> , (all data)                     | 0.0707                                                            | 0.1687                                                            |
| GOF on <i>F</i> <sup>2</sup>                               | 1.045                                                             | 1.031                                                             |

$${}^aR_1 = \Sigma(F_o - F_c)/\Sigma F_o. {}^b wR_2 = [\Sigma w(F_o^2 - F_c^2)^2/\Sigma w(F_o^2)^2]^{1/2a}.$$

**Table S2.** Selected bond lengths and angles for complexes **1** and **2**.

| <b>1</b>        |            |                 |            |                  |           |
|-----------------|------------|-----------------|------------|------------------|-----------|
| Dy(1)-O(1)      | 2.155(3)   | O(1)-Dy(1)-N(5) | 97.44(12)  | N(5)-Dy(1)-N(4)  | 64.52(11) |
| Dy(1)-O(2)      | 2.166(3)   | O(2)-Dy(1)-N(5) | 87.65(11)  | N(2)-Dy(1)-N(4)  | 69.02(11) |
| Dy(1)-N(1)      | 2.568(4)   | N(1)-Dy(1)-N(5) | 161.92(12) | O(1)-Dy(1)-Cl(1) | 101.52(8) |
| Dy(1)-N(5)      | 2.589(4)   | O(1)-Dy(1)-N(2) | 83.89(11)  | O(2)-Dy(1)-Cl(1) | 100.33(8) |
| Dy(1)-N(2)      | 2.601(3)   | O(2)-Dy(1)-N(2) | 76.94(11)  | N(1)-Dy(1)-Cl(1) | 81.38(9)  |
| Dy(1)-N(4)      | 2.606(3)   | N(1)-Dy(1)-N(2) | 65.24(11)  | N(5)-Dy(1)-Cl(1) | 81.06(9)  |
| Dy(1)-Cl(1)     | 2.6580(12) | N(5)-Dy(1)-N(2) | 131.69(11) | N(2)-Dy(1)-Cl(1) | 146.30(8) |
| O(1)-Dy(1)-O(2) | 158.07(11) | O(1)-Dy(1)-N(4) | 76.62(11)  | N(4)-Dy(1)-Cl(1) | 144.68(8) |
| O(1)-Dy(1)-N(1) | 90.23(11)  | O(2)-Dy(1)-N(4) | 86.55(11)  |                  |           |
| O(2)-Dy(1)-N(1) | 91.31(12)  | N(1)-Dy(1)-N(4) | 133.45(11) |                  |           |

| 2               |            |                 |          |                  |            |
|-----------------|------------|-----------------|----------|------------------|------------|
| Dy(1)-O(1)      | 2.141(6)   | O(1)-Dy(1)-N(3) | 87.5(2)  | N(3)-Dy(1)-N(4)  | 65.1(2)    |
| Dy(1)-O(2)      | 2.151(7)   | O(2)-Dy(1)-N(3) | 76.8(2)  | N(1)-Dy(1)-N(4)  | 132.6(2)   |
| Dy(1)-N(2)      | 2.567(8)   | N(2)-Dy(1)-N(3) | 133.6(2) | O(1)-Dy(1)-Br(1) | 99.26(16)  |
| Dy(1)-N(3)      | 2.582(7)   | O(1)-Dy(1)-N(1) | 77.5(2)  | O(2)-Dy(1)-Br(1) | 101.26(17) |
| Dy(1)-N(1)      | 2.590(7)   | O(2)-Dy(1)-N(1) | 84.3(2)  | N(2)-Dy(1)-Br(1) | 81.47(18)  |
| Dy(1)-N(4)      | 2.603(8)   | N(2)-Dy(1)-N(1) | 65.3(2)  | N(3)-Dy(1)-Br(1) | 144.44(17) |
| Dy(1)-Br(1)     | 2.8356(14) | N(3)-Dy(1)-N(1) | 69.1(2)  | N(1)-Dy(1)-Br(1) | 146.41(18) |
| O(1)-Dy(1)-O(2) | 159.4(2)   | O(1)-Dy(1)-N(4) | 88.7(3)  | N(4)-Dy(1)-Br(1) | 80.10(17)  |
| O(1)-Dy(1)-N(2) | 90.8(3)    | O(2)-Dy(1)-N(4) | 96.7(3)  |                  |            |
| O(2)-Dy(1)-N(2) | 90.4(3)    | N(2)-Dy(1)-N(4) | 161.2(2) |                  |            |

**Table S3.** The calculated results for Dy<sup>III</sup> ions configuration of complexes **1** and **2** by SHAPE 2.1 software.

| Configuration                                        | ABOXIY, <b>1</b> | ABOXIY, <b>2</b> |
|------------------------------------------------------|------------------|------------------|
| Heptagon ( $D_{7h}$ )                                | 33.230           | 33.143           |
| Hexagonal pyramid ( $C_{6v}$ )                       | 23.340           | 23.452           |
| <b>Pentagonal bipyramid (<math>D_{5h}</math>)</b>    | <b>1.824</b>     | <b>2.111</b>     |
| Capped octahedron ( $C_{3v}$ )                       | 7.899            | 8.343            |
| Capped trigonal prism ( $C_{2v}$ )                   | 6.102            | 6.461            |
| Johnson pentagonal bipyramid J13 ( $D_{5h}$ )        | 2.209            | 2.235            |
| Johnson elongated triangular pyramid J7 ( $C_{3v}$ ) | 21.882           | 22.465           |

**Table S4.** Deviations ( $\text{\AA}$ ) from the ideal plane defined by five coordination atoms for complexes **1**, **1'**, **2**, **2'** and **3**. The positive value denotes that the atom is located on the same side of the Dy atom, whereas a negative value denotes that the atom is located on the opposite side.

| Complex   | Coordination atoms |         |         |         |         | r.m.s. deviation |
|-----------|--------------------|---------|---------|---------|---------|------------------|
|           |                    |         |         |         |         |                  |
| <b>3</b>  | 0.0995             | -0.1170 | 0.0903  | -0.0265 | -0.0477 | 0.0833           |
| <b>2</b>  | -0.0046            | -0.0528 | 0.1548  | -0.2179 | 0.1837  | 0.1468           |
| <b>2'</b> | 0.1204             | 0.2111  | -0.2111 | -0.1204 | 0.0000  | 0.1536           |
| <b>1</b>  | -0.1632            | 0.2343  | -0.1887 | 0.0194  | 0.0402  | 0.1543           |
| <b>1'</b> | 0.2239             | -0.1292 | 0.1292  | -0.2239 | 0.0000  | 0.1634           |

**Table S5.** The distances between neighboring molecules packing along *a*, *b* and *c* directions for complexes **1** and **2**.

| Direction of Dy $\cdots$ Dy | Complex <b>1</b> | Complex <b>2</b> |
|-----------------------------|------------------|------------------|
|                             |                  |                  |

|                          |        |        |
|--------------------------|--------|--------|
| along <i>a</i> direction | 8.6164 | 8.6060 |
| along <i>b</i> direction | 8.4789 | 8.4697 |
| along <i>c</i> direction | 9.4825 | 9.5535 |

## 2. The $^1\text{H}$ NMR spectra of $\text{H}_2\text{bbpen-CH}_3$

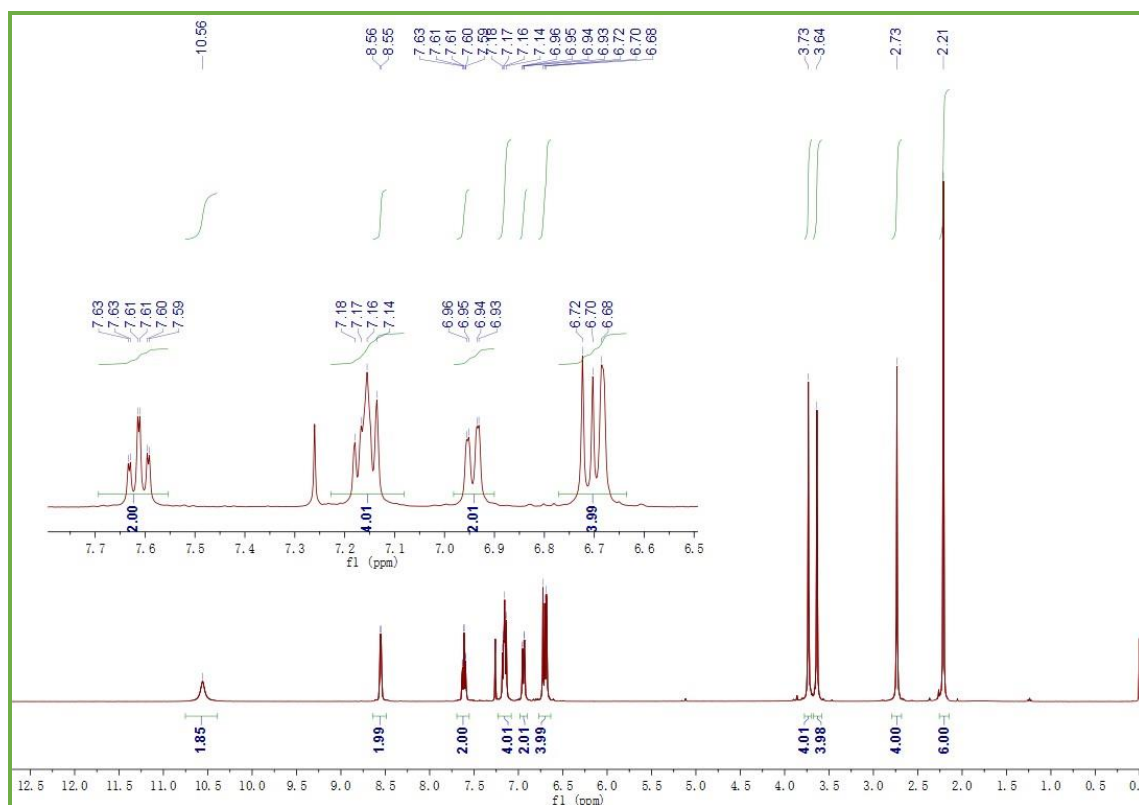

Figure S1.  $^1\text{H}$ -NMR spectra of the ligand  $\text{H}_2\text{bbpen-CH}_3$ .

## 3. X-Ray Powder Diffraction

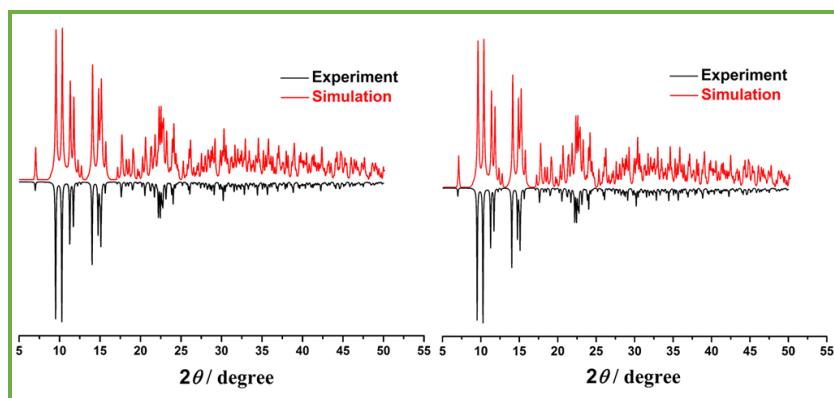

Figure S2. Experimental and simulated PXRD of complexes **1** (left) and **2** (right).

## 4. Crystal Structure

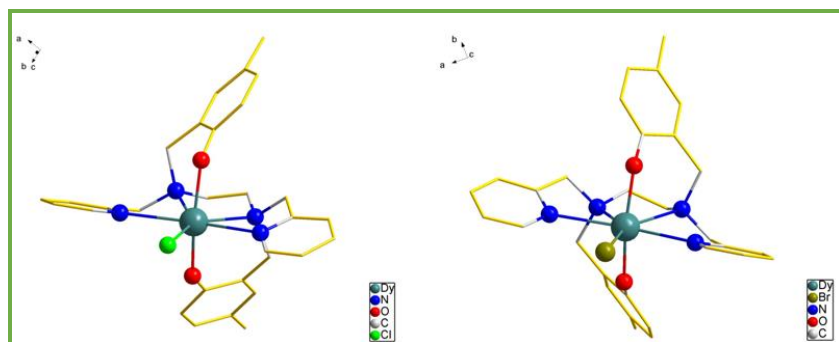

**Figure S3.** Molecular structures for **1** (left) and **2** (right). Hydrogen atoms are omitted for clarity. Color codes: Dy, blackish green; Cl, green; Br, brown; O, red; N, blue; C, silver.

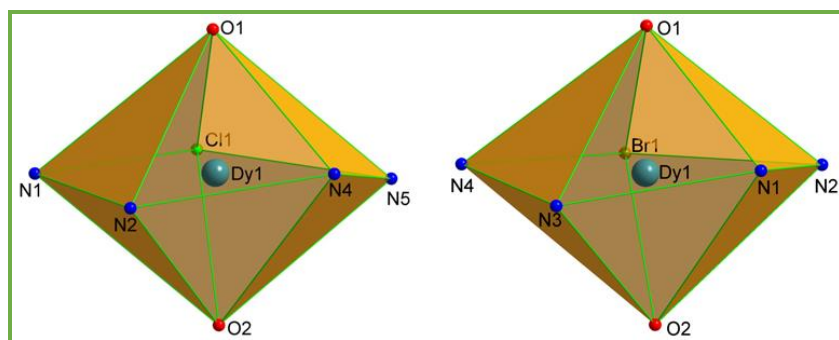

**Figure S4.** Polyhedrons showing  $D_{5h}$  symmetry around  $Dy^{III}$  ion for **1** (left) and **2** (right).

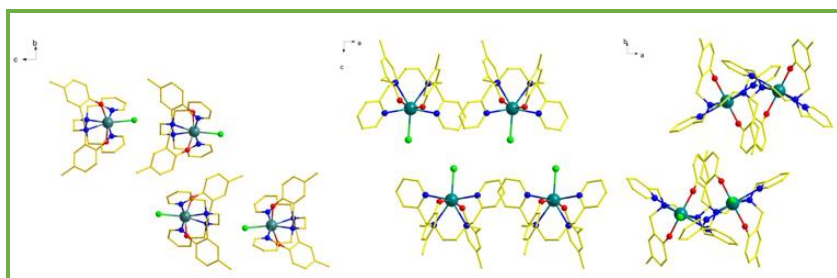

**Figure S5.** Packing diagram for complex **1** along  $a$ ,  $b$ ,  $c$  axes (from left to right).

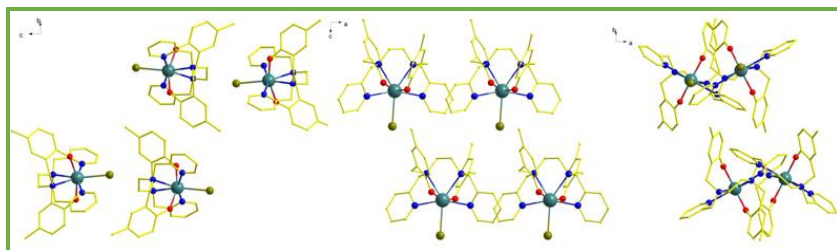

**Figure S6.** Packing diagram for complex **2** along  $a$ ,  $b$ ,  $c$  axes (from left to right).

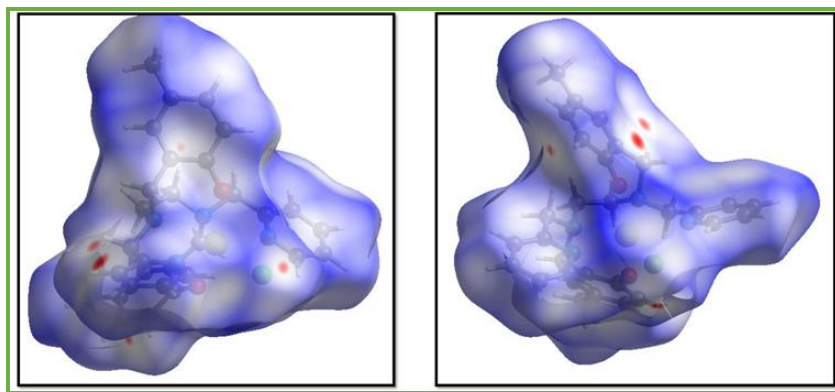

**Figure S7.** Hirshfeld surfaces calculation of complexes **1** (left) and **2** (right).

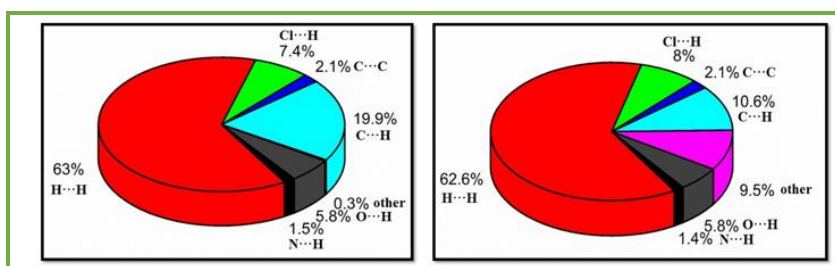

**Figure S8.** The individual atomic contact percentage contribution to the Hirshfeld surface for complexes **1** (left) and **2** (right).

## 5. Magnetic Measurements

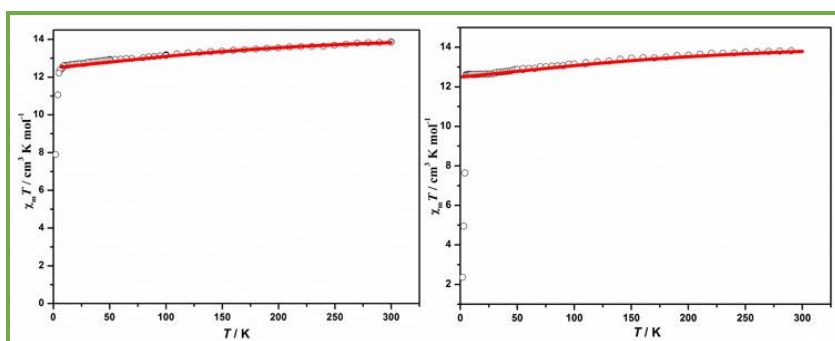

**Figure S9.** Field-dependencies of magnetization for complexes **1** (left) and **2** (right) at indicated temperatures. The field range is 0-7 T. The solid lines correspond to the *ab initio* calculations.

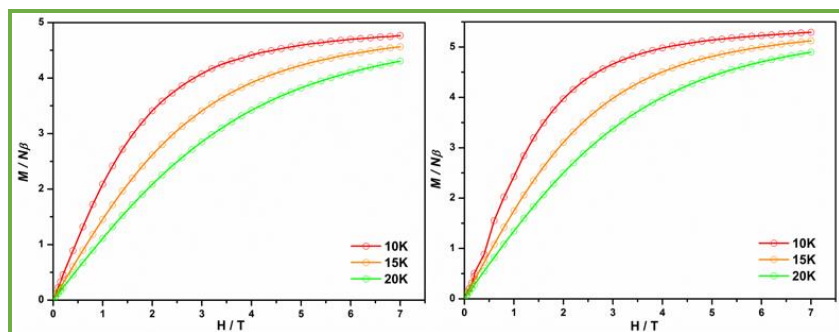

**Figure S10.** Variable field magnetisation of complexes **1** and **2**, at temperatures of 10 K, 15 K and 20 K.

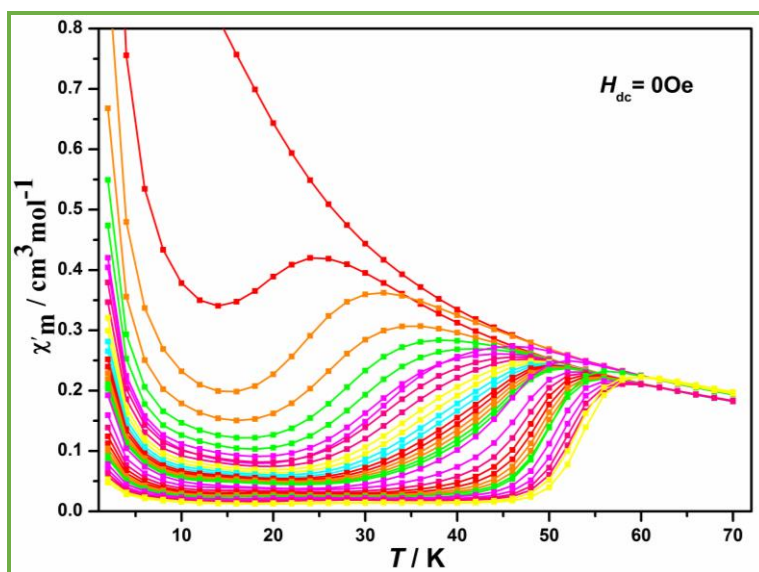

**Figure S11.** Temperature dependence of the in-phase in zero dc field for complex **1**.

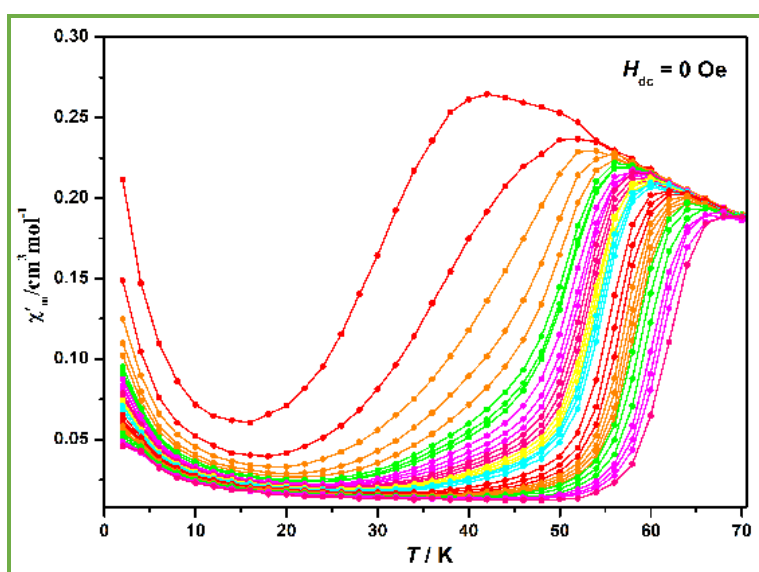

**Figure S12.** Temperature dependence of the in-phase in zero dc field for complex **2**.



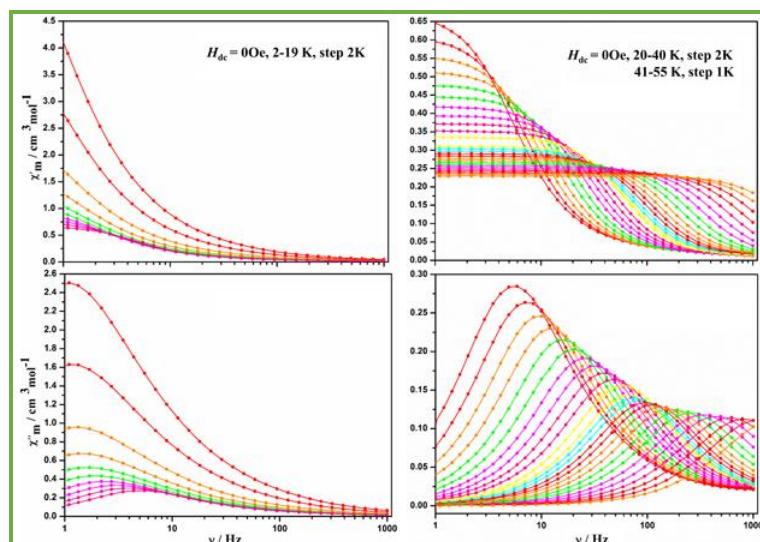

**Figure S13.** Variable frequency in-phase (top) and out-of-phase (bottom) magnetic susceptibility in zero dc field for complex **1** with the ac frequency of 1-1000 Hz.

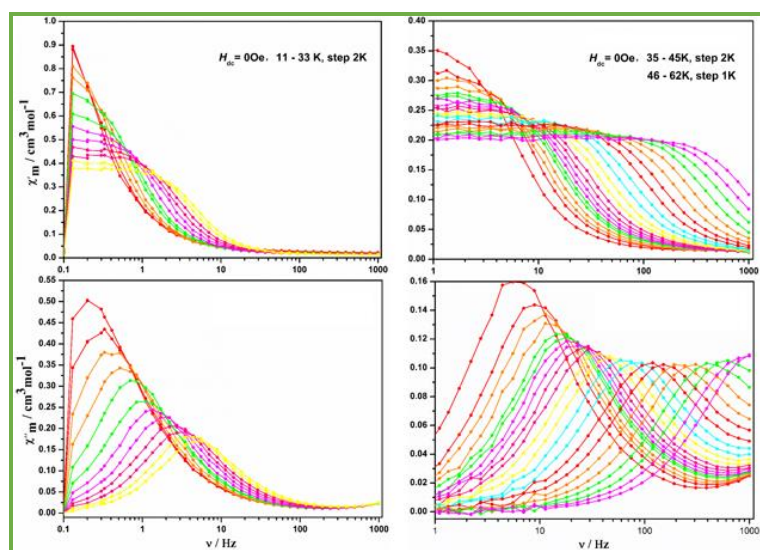

**Figure S14.** Variable frequency in-phase (top) and out-of-phase (bottom) magnetic susceptibility in zero dc field for complex **2** with the ac frequency of 1-1000 Hz.

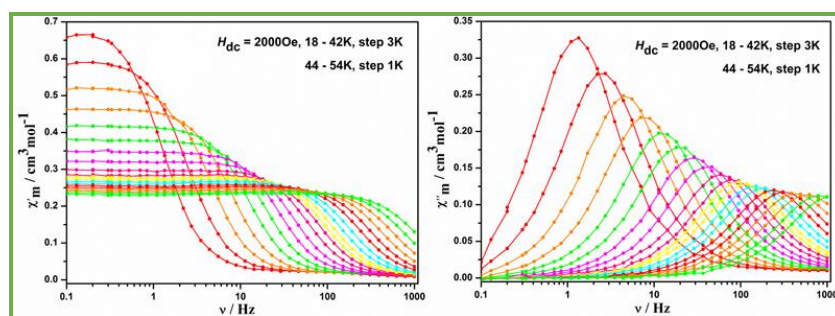

**Figure S15.** Variable frequency in-phase ( $\chi_m'$ ) (left) and (right) out-of-phase ( $\chi_m''$ ) components of the ac magnetic susceptibility for complex **1** between 18 and 54 K under 2000 Oe applied dc field.

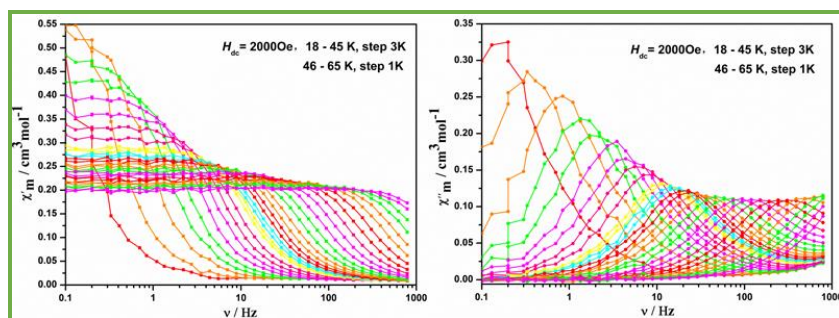

**Figure S16.** Variable frequency in-phase ( $\chi_m'$ ) (left) and (right) out-of-phase ( $\chi_m''$ ) components of the ac magnetic susceptibility for complex **2** between 18 and 65 K under 2000 Oe applied dc field.

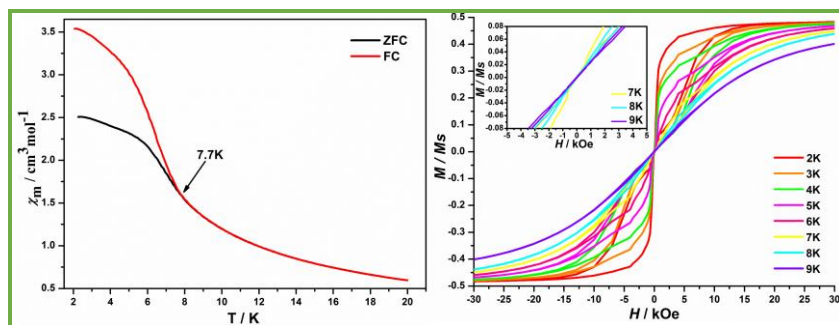

**Figure S17.** Variable-field magnetization data for complex **1**, under field-cooled (FC) and zero-field-cooled (ZFC) conditions with a field of 2000 Oe (left). Magnetic hysteresis loops were measured at a sweep rate of 0.02 T s<sup>-1</sup> from 2 to 9 K (right).

## 6. Fitting for complexes **1** and **2**

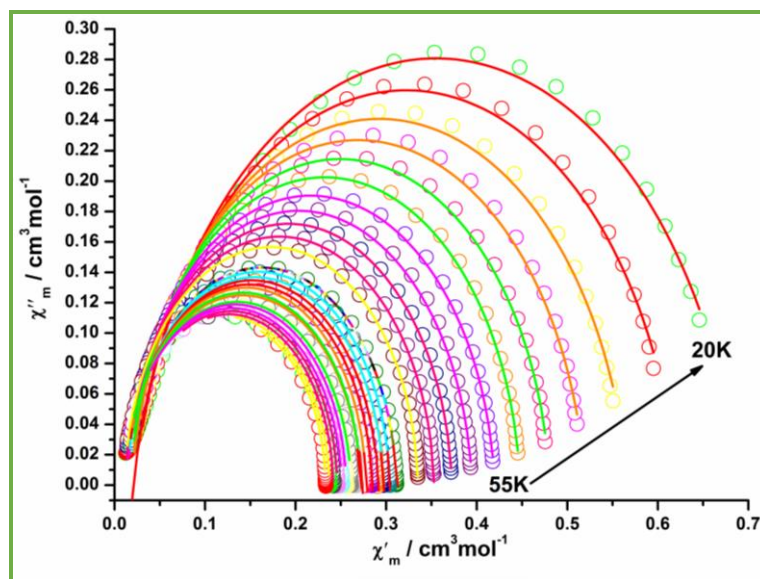

**Figure S18.** Cole-Cole plot for complex **1**. The solid lines are the best fits for the generalized Debye model between 20 K and 55 K.

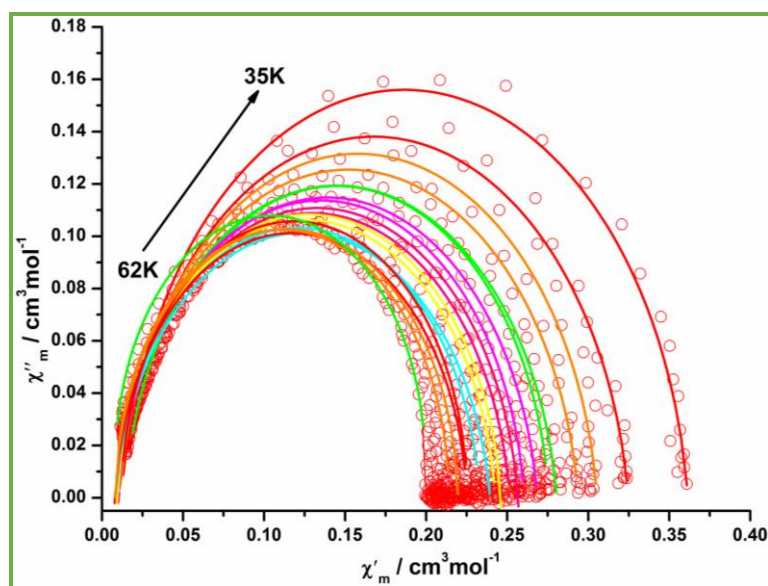

**Figure S19.** Cole-Cole plot for complex **2**. The solid lines are the best fits for the generalized Debye model between 35 K and 62 K.

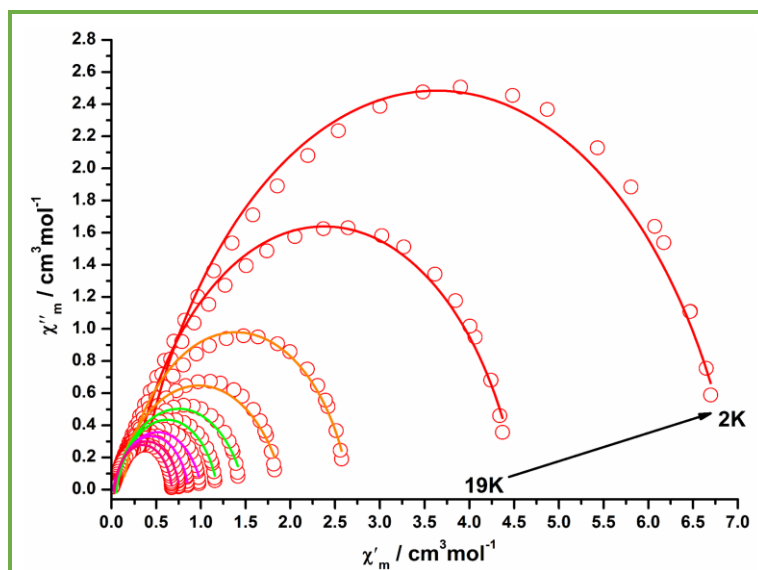

**Figure S20.** Cole-Cole plot of complex **1**. The solid lines are the best fits for the generalized Debye model between 2 K and 19 K.

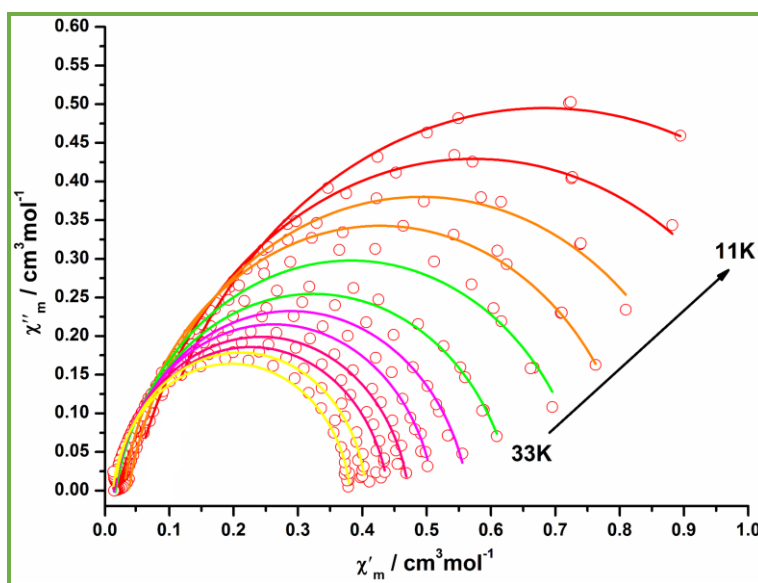

**Figure S21.** Cole-Cole plot of complex **2**. The solid lines are the best fits for the generalized Debye model between 11K and 33 K.

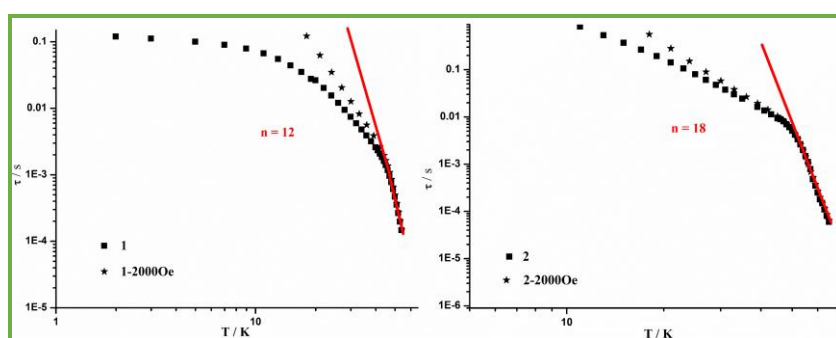

**Figure S22.** Temperature dependences of the magnetic relaxation times ( $\tau$ ) in log-log scale for S12

complexes **1** and **2**.

## 7. Computational details

**Table S6.** *Ab initio* computed relative energies (cm<sup>-1</sup>), principal values of the *g*-tensors and averaged transition magnetic moment  $\mu_{\text{QTM}}$  (in  $\mu_{\text{B}}$ ) of the eight lowest KDs of the complexes **1'**, **1**, **2'**, **2** and **3**.

|                 |                                     | <b>1'</b>                      | <b>1</b>                       | <b>2'</b>                      | <b>2</b>                       | <b>3</b>                       |
|-----------------|-------------------------------------|--------------------------------|--------------------------------|--------------------------------|--------------------------------|--------------------------------|
| KD <sub>0</sub> | <i>E</i>                            | 0.000                          | 0.000                          | 0.000                          | 0.000                          | 0.000                          |
|                 | <i>g<sub>Z</sub></i>                | <b>19.87402</b>                | <b>19.87766</b>                | <b>19.87993</b>                | <b>19.88260</b>                | <b>19.88907</b>                |
|                 | <i>g<sub>X</sub></i>                | 0.12483×10 <sup>-2</sup>       | 0.91759×10 <sup>-3</sup>       | 0.53783×10 <sup>-3</sup>       | 0.24718×10 <sup>-3</sup>       | 0.29090×10 <sup>-5</sup>       |
|                 | <i>g<sub>Y</sub></i>                | 0.16190×10 <sup>-2</sup>       | 0.12864×10 <sup>-2</sup>       | 0.64102×10 <sup>-3</sup>       | 0.36162×10 <sup>-3</sup>       | 0.42090×10 <sup>-5</sup>       |
|                 | <i>g<sub>XY</sub></i>               | 0.20443×10 <sup>-2</sup>       | 0.15801×10 <sup>-2</sup>       | 0.83676×10 <sup>-3</sup>       | 0.43802×10 <sup>-3</sup>       | 0.51164×10 <sup>-5</sup>       |
|                 | <i>g<sub>XY</sub>/g<sub>Z</sub></i> | <b>0.10286×10<sup>-3</sup></b> | <b>0.79492×10<sup>-4</sup></b> | <b>0.42091×10<sup>-4</sup></b> | <b>0.22030×10<sup>-4</sup></b> | <b>0.25725×10<sup>-6</sup></b> |
|                 | $\mu_{\text{QTM}}$                  | <b>0.47788×10<sup>-3</sup></b> | <b>0.36733×10<sup>-3</sup></b> | <b>0.19647×10<sup>-3</sup></b> | <b>0.10147×10<sup>-3</sup></b> | <b>0.11863×10<sup>-5</sup></b> |
| KD <sub>1</sub> | <i>E</i>                            | 371.009                        | 399.370                        | 390.437                        | 422.389                        | 559.490                        |
|                 | <i>g<sub>Z</sub></i>                | 16.89390                       | 16.95598                       | 16.98390                       | 17.00573                       | 16.96779                       |
|                 | <i>g<sub>X</sub></i>                | 0.12821                        | 0.99731×10 <sup>-1</sup>       | 0.68103×10 <sup>-1</sup>       | 0.54774×10 <sup>-1</sup>       | 0.42950×10 <sup>-3</sup>       |
|                 | <i>g<sub>Y</sub></i>                | 0.19389                        | 0.13304                        | 0.85862×10 <sup>-1</sup>       | 0.62064×10 <sup>-1</sup>       | 0.46806×10 <sup>-3</sup>       |
|                 | <i>g<sub>XY</sub></i>               | 0.23244                        | 0.16627                        | 0.10959                        | 0.82777                        | 0.63525×10 <sup>-3</sup>       |
|                 | <i>g<sub>XY</sub>/g<sub>Z</sub></i> | 0.13759×10 <sup>-1</sup>       | 0.98062×10 <sup>-2</sup>       | 0.64527×10 <sup>-2</sup>       | 0.48676×10 <sup>-2</sup>       | 0.37439×10 <sup>-4</sup>       |
|                 | $\mu_{\text{QTM}}$                  | 0.53683×10 <sup>-1</sup>       | 0.38795×10 <sup>-2</sup>       | 0.25661×10 <sup>-2</sup>       | 0.19473×10 <sup>-2</sup>       | 0.14959×10 <sup>-3</sup>       |
|                 | $\theta$                            | 0.55                           | 1.76                           | 0.52                           | 2.11                           | 0.40                           |
| KD <sub>2</sub> | <i>E</i>                            | 558.785                        | 634.225                        | 618.449                        | 694.441                        | 930.513                        |
|                 | <i>g<sub>Z</sub></i>                | 10.77129                       | 12.37989                       | 13.50033                       | 13.90615                       | 14.27792                       |
|                 | <i>g<sub>X</sub></i>                | 0.25243×10                     | 0.18065×10                     | 0.84548                        | 0.47723                        | 0.44008×10 <sup>-1</sup>       |
|                 | <i>g<sub>Y</sub></i>                | 0.63962×10                     | 0.37776×10                     | 0.15364×10                     | 0.79635                        | 0.47497×10 <sup>-1</sup>       |
|                 | <i>g<sub>XY</sub></i>               | 0.68763×10                     | 0.41873×10                     | 0.17537×10                     | 0.92839                        | 0.64751×10 <sup>-1</sup>       |
|                 | <i>g<sub>XY</sub>/g<sub>Z</sub></i> | 0.63839                        | 0.33824                        | 0.12990                        | 0.66761×10 <sup>-1</sup>       | 0.45350×10 <sup>-2</sup>       |
|                 | $\mu_{\text{QTM}}$                  | 0.14868×10                     | 0.93068                        | 0.39698                        | 0.21226                        | 0.15251×10 <sup>-1</sup>       |
|                 | $\theta$                            | 0.60000                        | 5.30000                        | 0.09000                        | 5.30000                        | 1.60000                        |
| KD <sub>3</sub> | <i>E</i>                            | 622.856                        | 717.516                        | 708.647                        | 819.567                        | 1126.031                       |
|                 | <i>g<sub>Z</sub></i>                | 1.54149                        | 10.19307                       | 9.71060                        | 9.25238                        | 11.00216                       |
|                 | <i>g<sub>X</sub></i>                | 0.72451×10                     | 0.20641×10                     | 0.48217×10                     | 0.45147×10                     | 0.51882                        |
|                 | <i>g<sub>Y</sub></i>                | 0.60805×10                     | 0.58435×10                     | 0.61028×10                     | 0.57474×10                     | 0.93728                        |
|                 | <i>g<sub>XY</sub></i>               | 0.94586×10                     | 0.61973×10                     | 0.77778×10                     | 0.73086×10                     | 0.10713×10                     |
|                 | <i>g<sub>XY</sub>/g<sub>Z</sub></i> | 0.61360×10                     | 0.60800                        | 0.80096                        | 0.78991                        | 0.97371×10 <sup>-1</sup>       |
|                 | $\mu_{\text{QTM}}$                  | 0.22209×10                     | 0.13179×10                     | 0.18208×10                     | 0.17104×10                     | 0.24268                        |
|                 | $\theta$                            | 12.48000                       | 84.68000                       | 90.00000                       | 74.07000                       | 5.90000                        |

|                 |                          |                          |                          |                          |            |                          |
|-----------------|--------------------------|--------------------------|--------------------------|--------------------------|------------|--------------------------|
| KD <sub>4</sub> | <i>E</i>                 | 691.048                  | 791.705                  | 765.468                  | 863.391    | 1155.752                 |
|                 | <i>g<sub>z</sub></i>     | 11.32019                 | 11.05055                 | 10.49331                 | 10.09497   | 16.81698                 |
|                 | <i>g<sub>x</sub></i>     | 0.12969×10               | 0.48518                  | 0.34816                  | 0.14547×10 | 0.54409×10 <sup>-1</sup> |
|                 | <i>g<sub>y</sub></i>     | 0.19106×10               | 0.46627×10               | 0.42690×10               | 0.48303×10 | 0.19843×10               |
|                 | <i>g<sub>xy</sub></i>    | 0.23092×10               | 0.46879E×10              | 0.42832×10               | 0.50446×10 | 0.19850×10               |
|                 | <i>g<sub>xy/gz</sub></i> | 0.20399                  | 0.42422                  | 0.40818                  | 0.49972    | 0.11804                  |
|                 | <i>μ<sub>QTM</sub></i>   | 0.53458                  | 0.85798                  | 0.76953                  | 0.10475×10 | 0.33978                  |
|                 | <i>θ</i>                 | 74.90000                 | 95.91000                 | 72.22000                 | 93.19000   | 88.12000                 |
| KD <sub>5</sub> | <i>E</i>                 | 713.275                  | 805.464                  | 778.095                  | 877.336    | 1191.531                 |
|                 | <i>g<sub>z</sub></i>     | 13.95325                 | 11.92035                 | 15.57009                 | 9.06478    | 2.76496                  |
|                 | <i>g<sub>x</sub></i>     | 0.35431×10 <sup>-1</sup> | 0.11612×10               | 0.18543                  | 0.89482    | 0.95601×10               |
|                 | <i>g<sub>y</sub></i>     | 0.33793                  | 0.39939×10               | 0.15844×10               | 0.47383×10 | 0.81047×10               |
|                 | <i>g<sub>xy</sub></i>    | 0.33978                  | 0.41593×10               | 0.15952×10               | 0.48220×10 | 0.12533×10 <sup>2</sup>  |
|                 | <i>g<sub>xy/gz</sub></i> | 0.24352×10 <sup>-1</sup> | 0.34893                  | 0.10245                  | 0.53195    | 0.45329×10               |
|                 | <i>μ<sub>QTM</sub></i>   | 0.62227×10 <sup>-1</sup> | 0.85918                  | 0.29497                  | 0.93885    | 0.29441×10               |
|                 | <i>θ</i>                 | 97.56000                 | 96.82000                 | 85.56000                 | 86.13000   | 12.74000                 |
| KD <sub>6</sub> | <i>E</i>                 | 730.748                  | 826.973                  | 784.950                  | 897.785    | 1210.806                 |
|                 | <i>g<sub>z</sub></i>     | 18.25953                 | 16.63400                 | 12.27662                 | 10.06968   | 15.00569                 |
|                 | <i>g<sub>x</sub></i>     | 0.97817×10 <sup>-1</sup> | 0.99311×10 <sup>-1</sup> | 0.15556×10               | 0.12124    | 0.13508×10               |
|                 | <i>g<sub>y</sub></i>     | 0.13030                  | 0.10948×10               | 0.31525×10               | 0.28780×10 | 0.31727×10               |
|                 | <i>g<sub>xy</sub></i>    | 0.16293                  | 0.10993×10               | 0.35154×10               | 0.28806×10 | 0.34483×10               |
|                 | <i>g<sub>xy/gz</sub></i> | 0.89230×10 <sup>-2</sup> | 0.66086×10 <sup>-1</sup> | 0.28635                  | 0.28607    | 0.22980                  |
|                 | <i>μ<sub>QTM</sub></i>   | 0.38019×10 <sup>-1</sup> | 0.19902                  | 0.78468                  | 0.49987    | 0.75392                  |
|                 | <i>θ</i>                 | 75.69000                 | 92.23000                 | 84.93000                 | 92.43000   | 87.89000                 |
| KD <sub>7</sub> | <i>E</i>                 | 809.347                  | 873.100                  | 853.009                  | 944.216    | 1224.079                 |
|                 | <i>g<sub>z</sub></i>     | 19.04282                 | 16.86389                 | 18.23157                 | 15.41390   | 13.67243                 |
|                 | <i>g<sub>x</sub></i>     | 0.14486×10 <sup>-1</sup> | 0.53676                  | 0.17011                  | 0.10363×10 | 0.39835                  |
|                 | <i>g<sub>y</sub></i>     | 0.52539×10 <sup>-1</sup> | 0.86355                  | 0.25651                  | 0.32077×10 | 0.59629×10               |
|                 | <i>g<sub>xy</sub></i>    | 0.54499×10 <sup>-1</sup> | 0.10168×10               | 0.30779                  | 0.33710×10 | 0.59762×10               |
|                 | <i>g<sub>xy/gz</sub></i> | 0.28619×10 <sup>-2</sup> | 0.60293×10 <sup>-1</sup> | 0.16882×10 <sup>-1</sup> | 0.21870    | 0.43710                  |
|                 | <i>μ<sub>QTM</sub></i>   | 0.11171×10 <sup>-1</sup> | 0.23339                  | 0.71103×10 <sup>-1</sup> | 0.70733    | 0.10602×10               |
|                 | <i>θ</i>                 | 109.05000                | 91.67000                 | 107.82000                | 104.69000  | 88.75000                 |

<sup>a</sup>Theoretical results calculated on structures including one solvent molecule are shown in parentheses.

**Table S7.** The angle between the *ab initio* easy axis and the axial Dy-O bond of complexes **1** and **2**.

| Complex  | θ1(O2) | θ2(O3) | averaged |
|----------|--------|--------|----------|
| <b>1</b> | 10.764 | 11.192 | 10.978   |
| <b>2</b> | 10.448 | 10.196 | 10.322   |

<sup>a</sup> deviation from the magnetic hard plane. <sup>b</sup> deviation from the averaged Z coordinate.

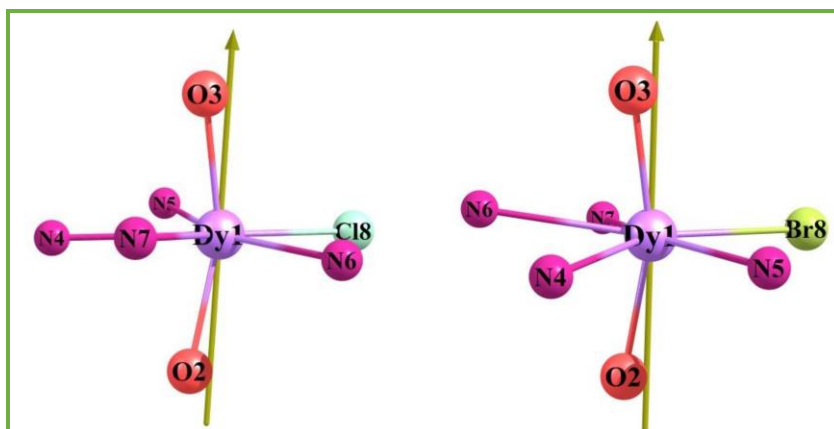

**Figure S23.** Direction of the *ab initio* magnetic easy axis of ground KD of complexes **1** and **2** (only central Dy<sup>III</sup> and first sphere are shown for the sake of clarity).

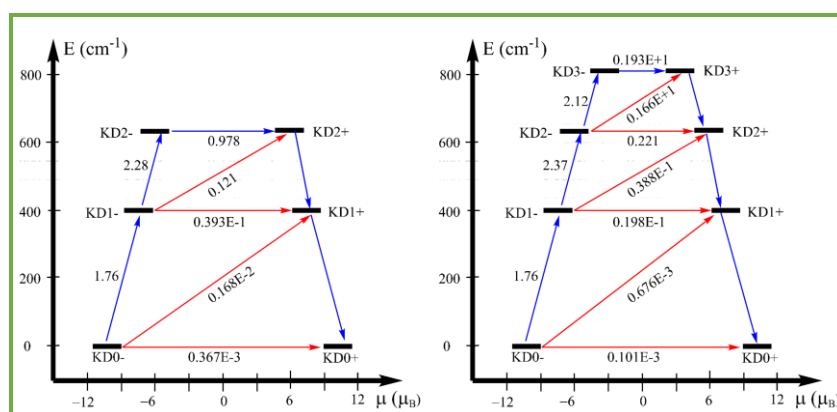

**Figure S24.** Magnetization blocking barrier in **1** (left) and **2** (right). Exchange states are arranged according to the values of their magnetic moments (bold horizontal black lines). Arrows show the transition between the states, while the numbers above the arrows are the corresponding average matrix element of the magnetic moment ( $\mu$ ). Relaxation pathway is outlined by arrows containing the largest  $\mu$  (blue arrows).

## 8. Discussion section

**Table S8.**  $U_{\text{eff}}$  and  $T_B$  for complexes **1'**, **1**, **2'**, **2** and **3**.

| Complex                         | <b>1'</b> | <b>1</b> | <b>2'</b> | <b>2</b> | <b>3</b> |
|---------------------------------|-----------|----------|-----------|----------|----------|
| $U_{\text{eff}}/\text{K}$       | 708       | 723      | 1025      | 1162     | 1837     |
| $T_B$ (0.02 T·s <sup>-1</sup> ) | 8         | 9        | 14        | 15       | -        |

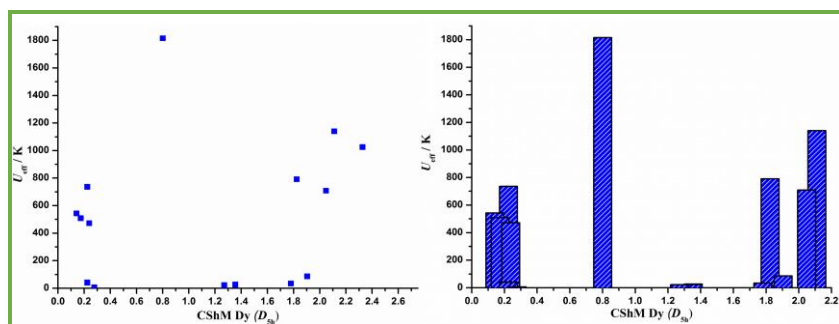

**Figure S25.** CshM vs  $U_{\text{eff}}$  for some typical  $D_{5h} \text{Dy}^{\text{III}}$ -SMM.

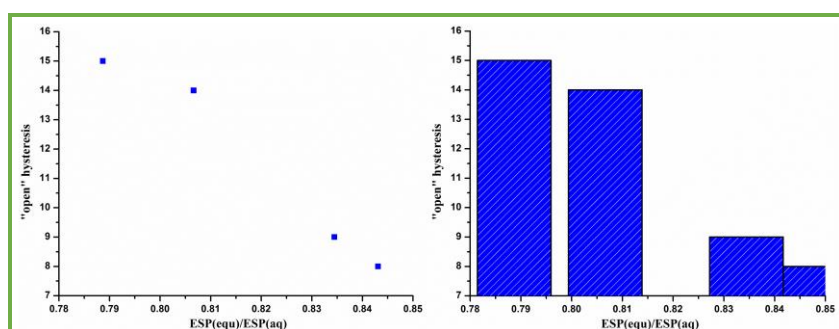

**Figure S26.** ESP(equ)/ESP(ax) vs “open” hysteresis for complexes  $1'$ ,  $1$ ,  $2'$  and  $2$ .

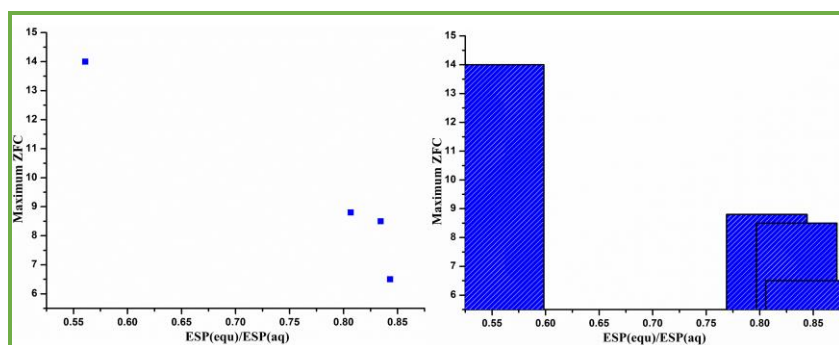

**Figure S27.** ESP(equ)/ESP(ax) vs maximum ZFC for complexes  $1$ ,  $2'$ ,  $2$  and  $3$ .



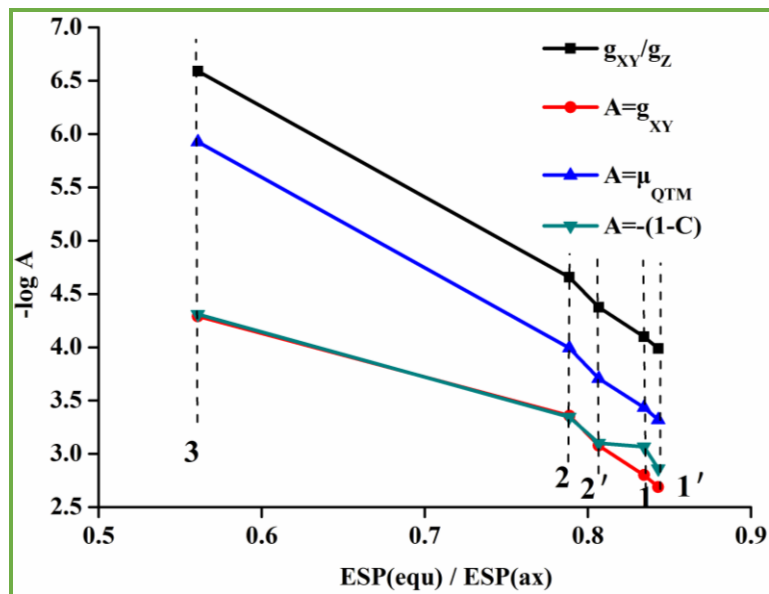

Figure S28. ESP(equ)/ESP(ax) vs  $-\log A$  for complexes 1, 1', 2, 2' and 3.

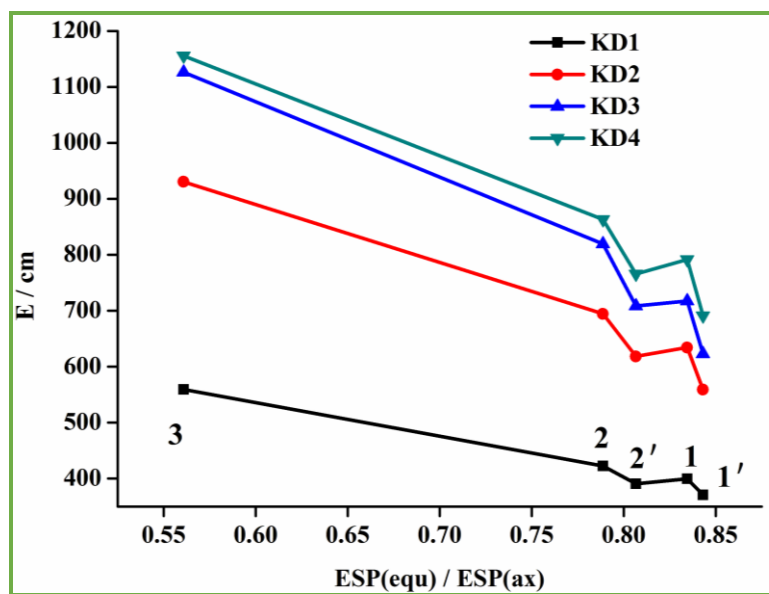

Figure S29. ESP(equ)/ESP(ax) vs E / cm for complexes 1, 1', 2, 2' and 3.

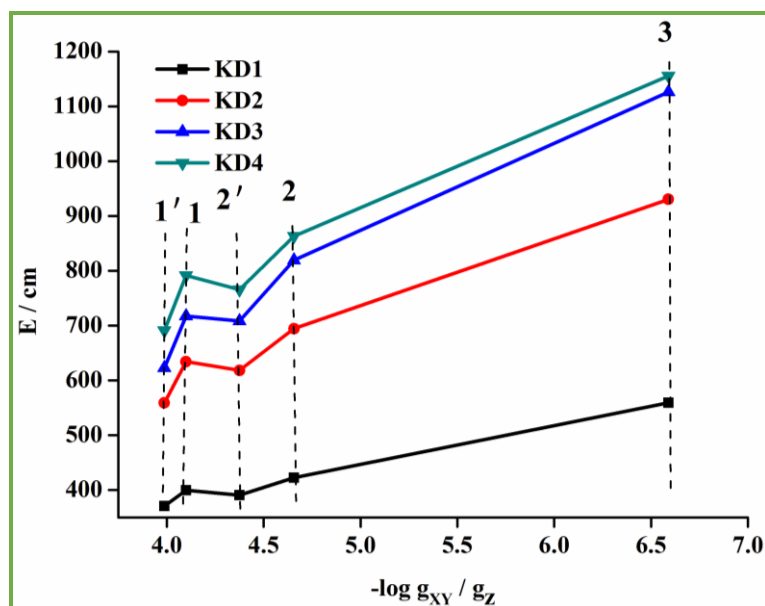

Figure S30. ESP(equ)/ESP(ax) vs E/cm for complexes 1, 1' , 2, 2' and 3.

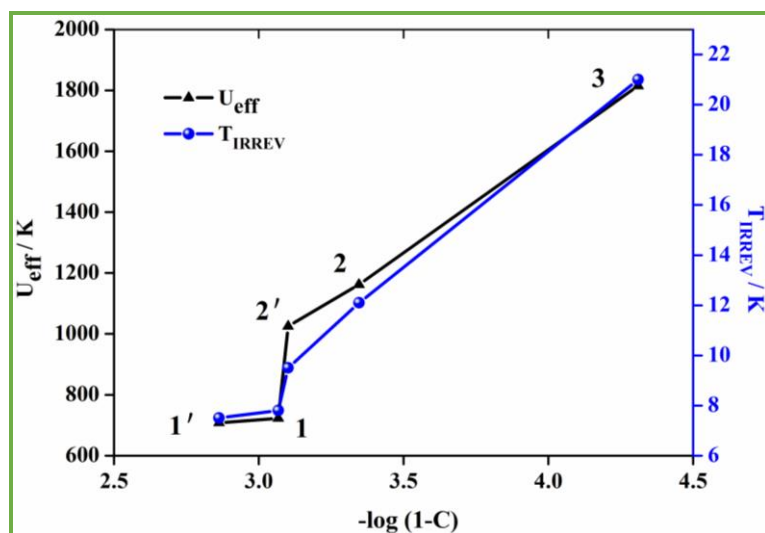

Figure S31.  $-\log(1-C)$  vs  $U_{eff}$ ,  $T_{IRREV}$  for complexes 1, 1' , 2, 2' and 3.

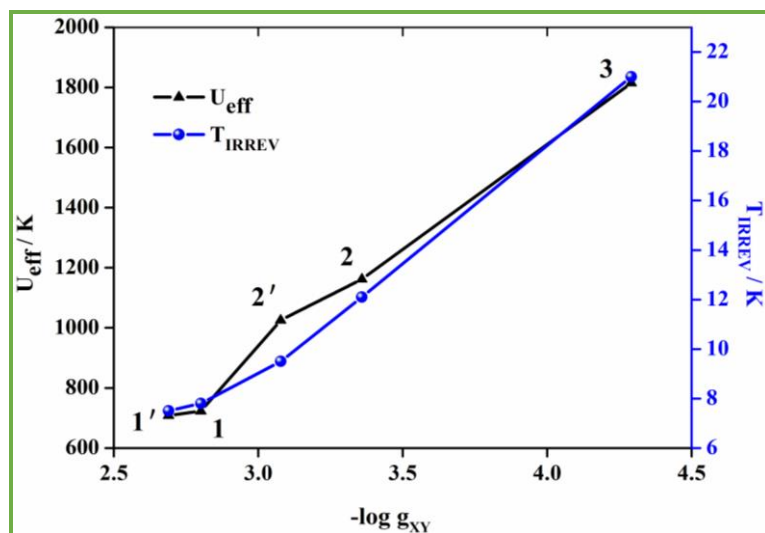

**Figure S32.**  $-\log g_{XY}$  vs  $U_{eff}$ ,  $T_{IRREV}$  for complexes **1**, **1'**, **2**, **2'** and **3**.
